# Supplementary material
Source: PubMed Central journal article supplement (PMC6735258)
Supplement: bhy321_supplementary_figure_1_fn.pdf [file bhy321_supplementary_figure_1_fn.pdf]

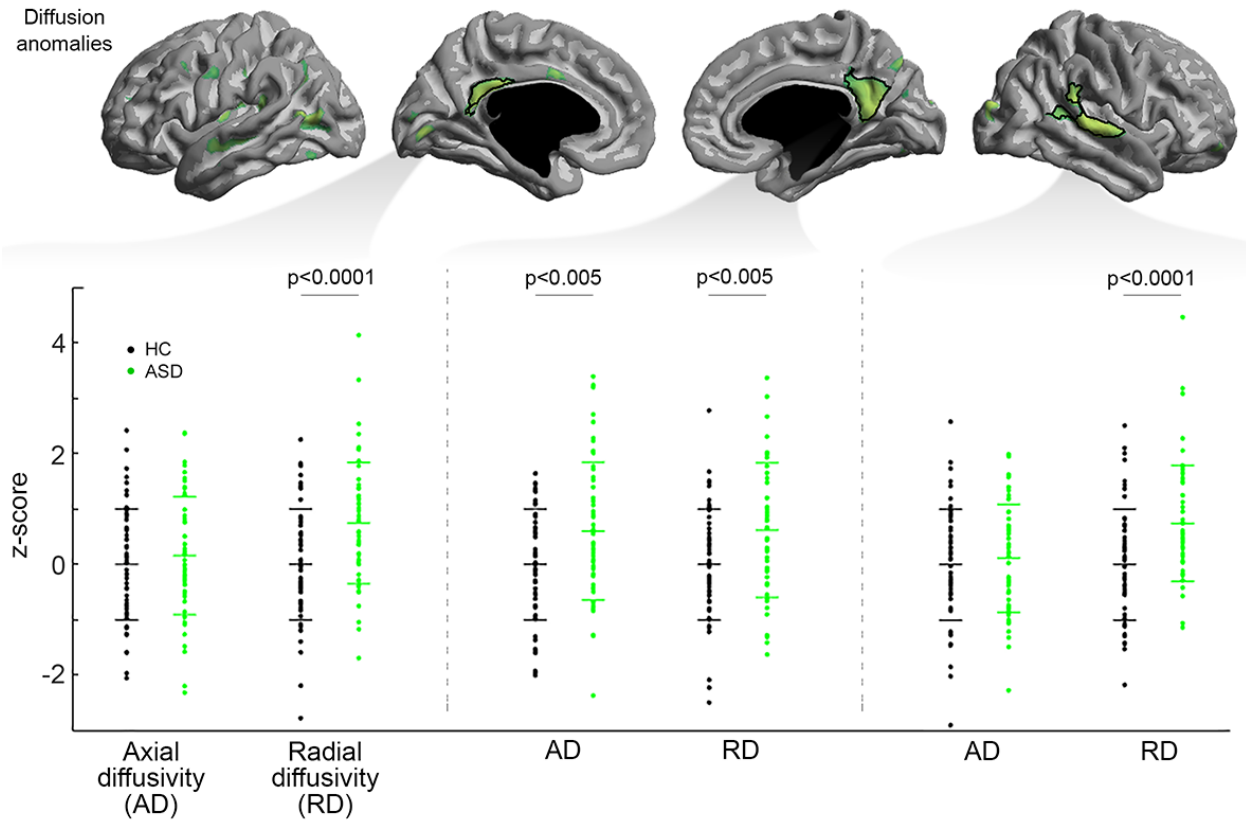

**SUPPLEMENTARY FIGURE 1.** Post-hoc analyses to evaluate between group differences in axial diffusivity (AD) and radial diffusivity (RD) in significant clusters of multivariate diffusion anomalies in ASD (see *Figure 1*). All clusters showed increased RD together with right PCC showing additional AD increases.
